# Supplementary material
Source: PubMed Central journal article supplement (PMC2971596)
Supplement: pp.110.159038_1.pdf [file pp.110.159038_1.pdf]

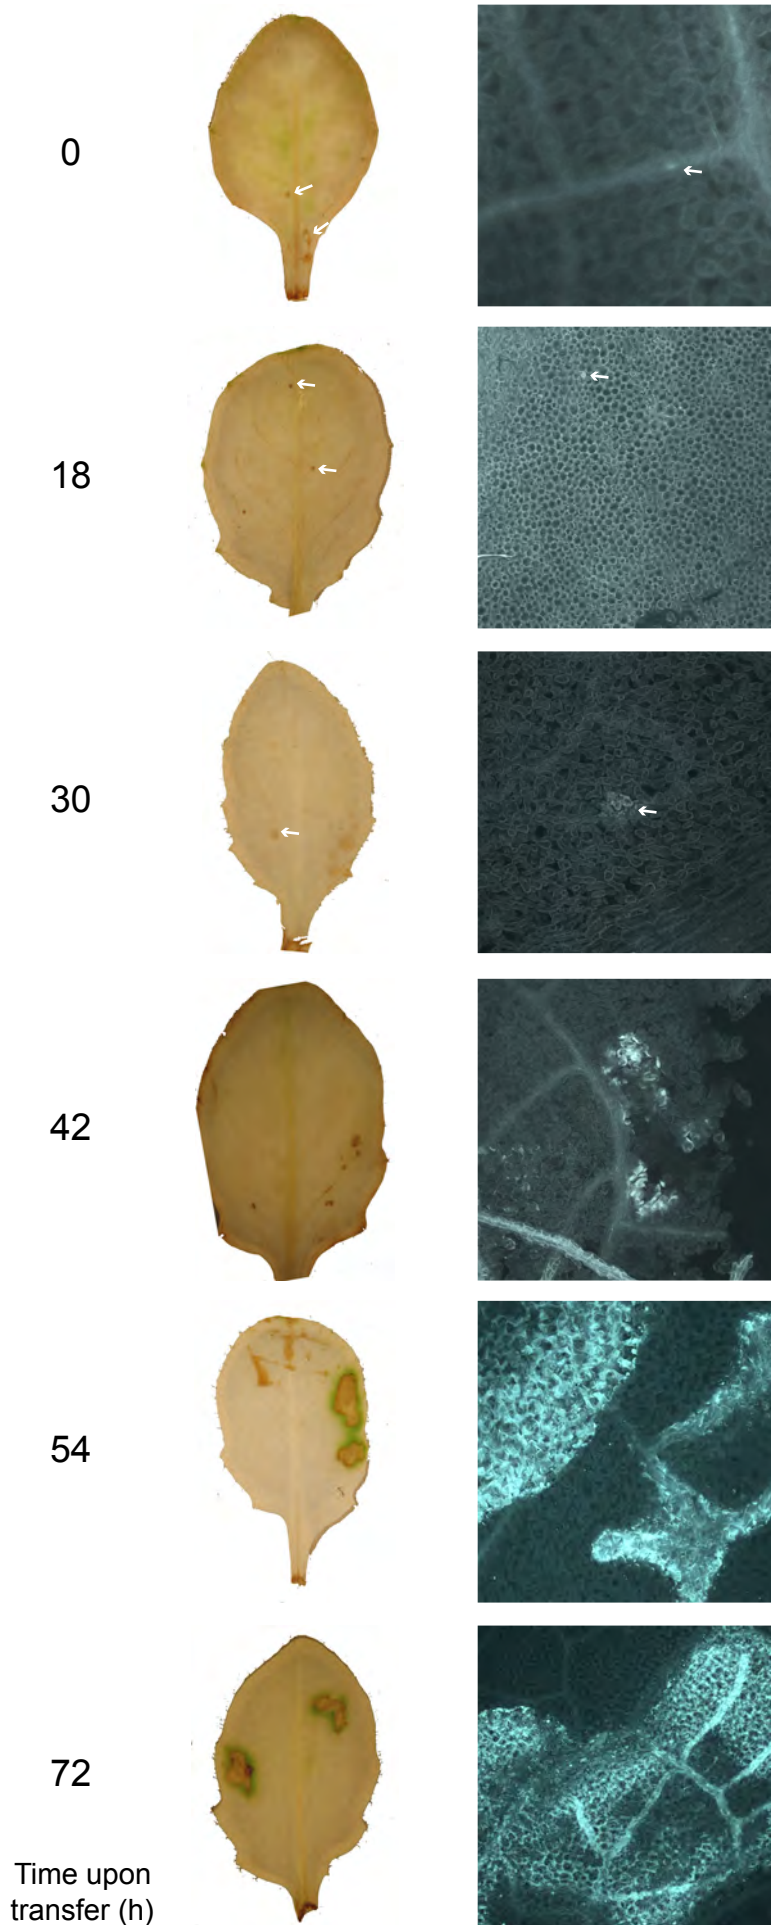

Figure S11

**Transfer of *aca4/11* to a non-suppressing growth medium induces an accumulation of ROS and the apparition of callose deposits.** Plants grown hydroponically in an anion suppression condition (showing no visible lesions) were transferred at  $t = 0\text{h}$  into a standard solution. ROS levels (full leaves pictures) and callose deposition (leaves microscopy pictures- 1,3 mm wide) were tracked by DAB and aniline blue staining, respectively, during 54 to 72h. ROS can be visualized as dark brown dots, and callose deposits as brighter regions (see arrows).

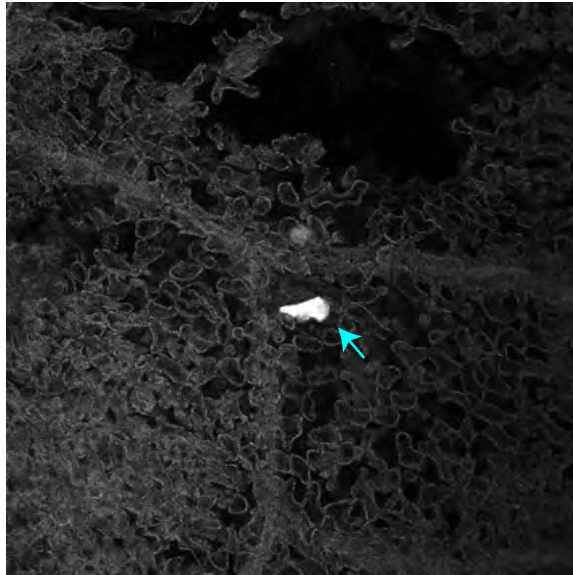

t = 18 h

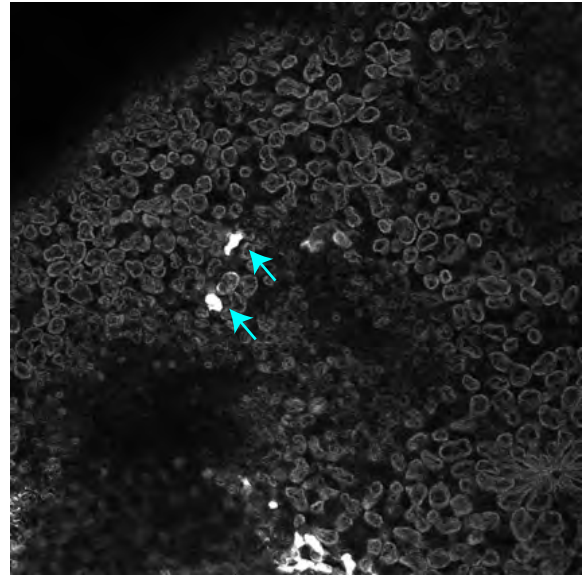

t = 30 h

Figure SI2

**Lesions initials in *aca4/11* occurs predominantly in mesophyll cells.** Leaves of *aca4/11*, transferred from an anion suppression solution to a standard hydroponic solution, were stained with aniline blue for callose deposition. The figure presents two examples of optical sections of leaves (size: 1,3 mm) taken at 18h (left) or 30h (right) after transfer. Arrows indicate aniline blue-stained cells considered as micro-lesions. Globular shaped spaced cells correspond to mesophyll cells while closed round-shaped cells are considered as parenchyma.

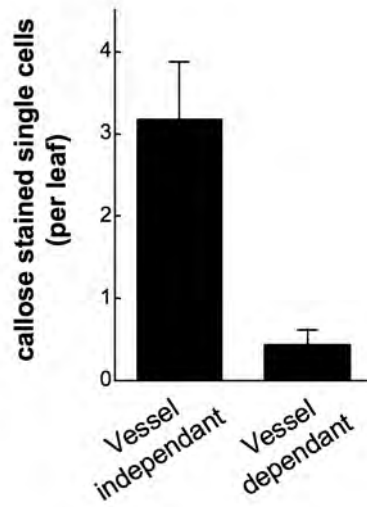

Figure SI3

Lesions and vessels localization were compared. Lesions initials stained with aniline blue (see Figure 4 and 5) appearing within 25mm of a vessel were considered as vessel associated. Average number of lesion initials per leaf and vessel dependent lesion initials for  $t=18$  and  $30h$  are presented ( $\pm$  SEM,  $n=16$ ).

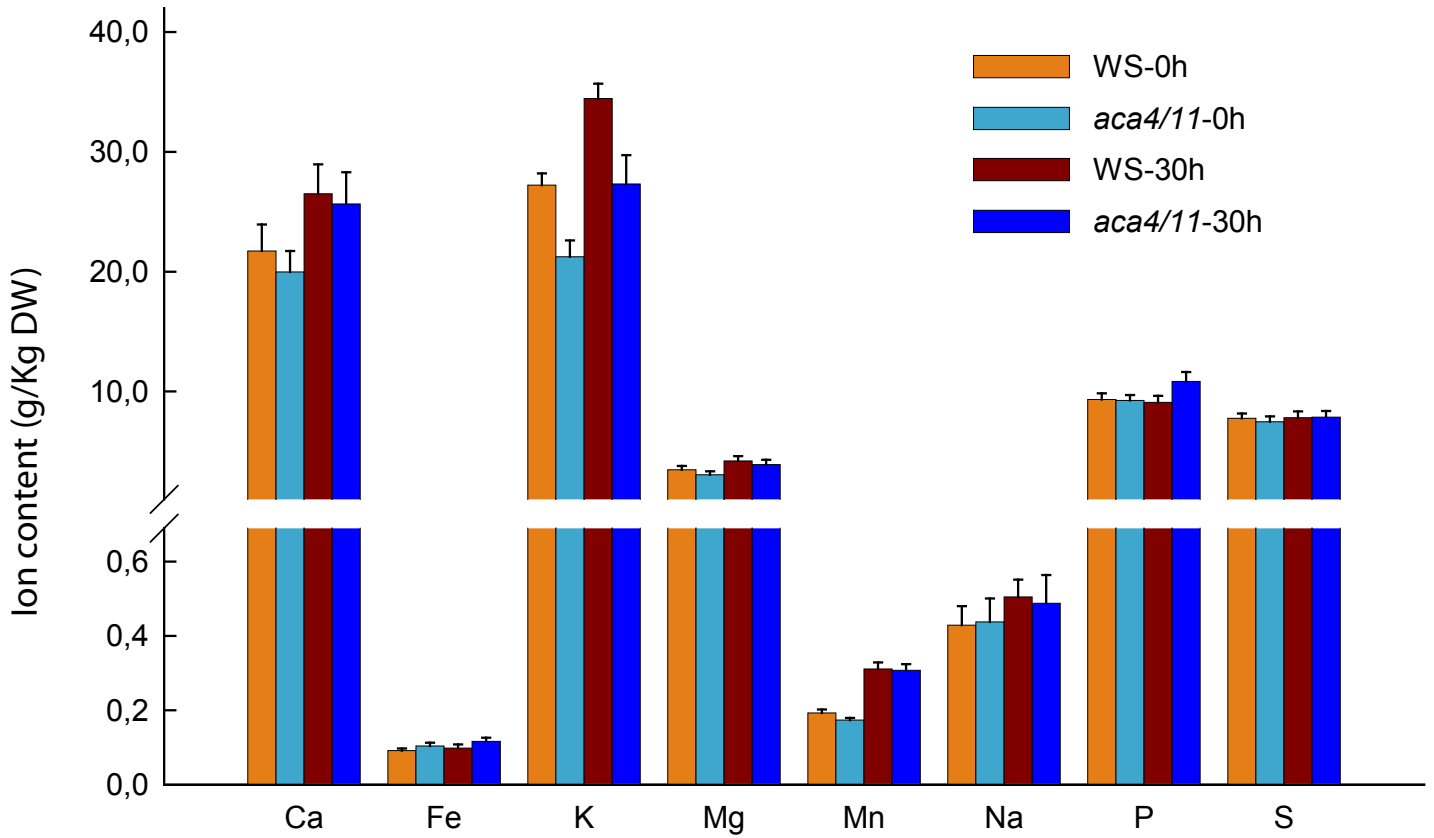

Figure SI4

Ion analysis measurements by ICP-AES providing the content of major ions in *aca4-1/11-1* and WS plants grown in standard hydroponic solution supplemented with 15mM  $\text{NH}_4\text{NO}_3$  (lesion suppressed conditions), or in plants grow in parallel and transferred for 30h to a “lesion inducing solution” (standard hydroponic solution) (see Figure 4). No significant difference between WS and *aca4-1/11-1* were found, except a 20% reduction ( $p < 0.05$ ) for K in the double mutant in all conditions.

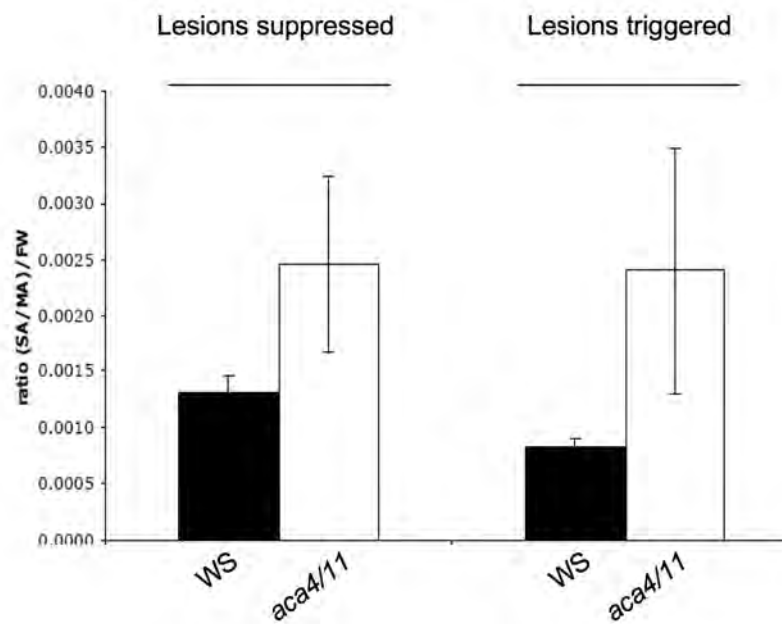

Figure S15

**Relative SA levels in *aca4/11* upon lesion induction.**

The lesion induction was conducted similarly to fig. 4. Metabolites were extracted with chloroform and SA was measured by GC-MS after derivatization. SA levels are expressed relatively to the internal control mandelic acid (MA, added during the extraction) and rosette fresh weight (FW)

Figure SI6: DNA sequence of the *ACA11-GFP* constructs.

ps1657, *ACA11promoter::ACA11-GFP* (The promoter is cloned between a unique *Sbf1* site at 2623 and a unique *Xho1* site at 4758. The *ACA11-GFP* cDNA coding sequence is cloned between *Xho1* at 4758 and a unique *SacI* at 8626.

```
TTTTTATCCCGGAAGCCTGTGGATAGAGGGTAGTTATCCACGTGAAACCGCTAATGCCCGCAAAGCCTTGATTCACGG
GGCTTTCCCGCCCGCTCCAAAACTATCCACGTGAAATCGCTAATCAGGGTACGTGAAATCGCTAATCGGAGTACGTGAA
ATCGCTAATAAGGTCACGTGAAATCGCTAATCAAAAAGGCACGTGAGAACGCTAATAGCCCTTTCAGATCAACAGCTTGC
AAACACCCCTCGCTCCGGCAAGTAGTTACAGCAAGTAGTATGTTCAATTAGCTTTTCAATTATGAATATATATATCAATT
ATTGGTCGCCCTTGCTTGTGGACAATGCGCTACGCGCACCGGCTCCGCCCTGGACAACCGCAAGCGGTTGCCACCGT
CGAGCGCCAGCGCCTTGGCCCAACCCGGCGGGCCGCGCAACAGATCGTTTTATAAATTTTTTTTTTAAAAAGAAA
AAGCCCGAAAGGCGGCAACCTCTCGGCCTTCGGATTTCCGATCCCGGAATTAGAGATCTTGGCAGGATATATTGTGGT
GTAACGTTATCGATCTGGATTTTAGTACTGGATTTGGTTTTAGGAATTAGAAATTTTATTGATAGAAGTATTTTACAAA
TACAAATACATACTAAGGGTTCTTATATGCTCAACACATGAGCGAAACCTATAAGAACCCTAATTTCCCTTATCGGGA
AACTACTCACACATTTATTTAGGAGAAAATAGAGAGAGATAGATTTGTAGAGAGAGACTGGTGATTTTCAGCGTACCGAAT
TAATTTCCCGGCACCGAGCCGAGCTTAGCGAAGTGTGGACGAGAACTGTGCCACCAAGCGTAAGCGGTTCTCTCG
CATTTGCCTTGCTAGGCTCGCGGAGTTGCTGGCTGAGCGCTTCTCGAAATCAGCTCTTGTTCGGTTCGGCATCTACTCTA
TTCCTTTGCCCTCGGACGAGTGTGGGGCGTGGTTCCACTATCGCGGAGTACTTCTACACAGCCATCGGTCCAGACGG
CCGCGCTTTCGGGGCGATTGTGTACGCCGACAGTCCCGGCTCCGGATCGGACGATTGCGTTCGCATCGACCTTGCGCC
CAAGCTGCATCATCGAAATTCCTGCAACCAAGCTCTGATAGAGTTGGTCAAGACCAATCGGGAGCATATACGCCCGGAG
GCGTGGCGATCTGCAAGCTCCGGATGCCTCCGCTCGAAGTAGCGCTGCTGCTCCATAAAGCCAACCCAGGCTCC
AGAAGAAGATGTTGGCGACCTCGTATTGGGAATCCCGAACATCGCCTCGCTCCAGTCAATGACCGCTGTTATGGGCCA
TTGTCCTGACAGGACATGTTGGAGCCGAAATCCGCGTGACAGAGTCCCGGACTTCCGGGCGAGTCCCGGCCAAAGCAT
CAGCTCATCGAGAGCTGCGCCGACGAGCAGCTGACCGTGTCTCCATCACAGTTTGCAGTATACACATGGGGATCAG
CAATCGCGCATATGAAATCAGCCATGTAGTGTATTGACCGATTCTTGGCGTCCGAATGGGCCGAACCCGCTCGTCTGG
CTAAGATCGGCCGACGCGATCGCATCCATAGCCTCCCGGACCGGCTGAAGAACAGCGGGCAGTTCCGGTTTCAGGACGGT
TTGCAACGTTGACACCTGTGACCGCGGGAGATGCAATAGGTCAAGCTCTCGCTGAACTCCCAATGTCAAGCACTTCCG
GAATCGGGAGCGCGGCCGATGCAAGTGCAGATAAACATAACGATCTTGTAGAAACCATCGGCGCAGCTATTTACCCCG
AGGACATATCCAGCCCTCTACATCGAAGCTGAAAGCAGAGATTTCCGCCCTCCGAGAGCTGCATCAGGTCCGAGAC
GCTGTGCAACTTTTCGATCAGAACTTCTCGACAGAGCTCGCGGTGAGTTCCAGGCTTTTTTCATAGGGATCAGTTGGGGT
GTCTCTCCAAATGAAATGAACTTCTTATATAGAGGAAGGGTCTTGGCAAGGATAGTGGATTGTGCGTCACTCCCTTAC
GTCAGTGGAGATGTCACATCAATCCACTTGCCTTGAAGACGTGGTTGGAACGCTCTTCTTTTCCACGATGCTCCTCGTGG
GTGGGGTCCATCTTTGGGACCCTGTGCGCAGAGGCATCTTGAATGATAGCCTTTCTTTATCGCAATGATGGCATTG
TAGGACCCACCTTCTTCTACTGTCTTTCGATGAAGTGCAGATAGTGGGCAATGGAATCCGAGGAGGTTTCCCGCA
AATTACCTTTTGTGAAAAGTCTCAATAGCCCTTTGGTCTTCTGAGACTGTATCTTTGACATTTTTGGAGTAGGGGTACG
ATAACATTAACGTTTACAATTTCCGCCCATTCGCCATTCAGGCTGCGCAACTGTTGGGAAGGGCGATCGGTGCGGGCTC
TTCGCTATTACGCCAGCTGGCGAAAGGGGGATGTGCTGCAAGCGGATTAAGTTGGGTAACGCCAGGTTTTCCAGTCA
GACGTTGTAACGACGCGCCAGTGAATGTAATACGACTCACTATAGGGCGAATGGGTACCCCTGCAGGAAGCTTGAGA
GCTTTTAAAGCTGTGAGTTTACTCCATGTGCTCTTACTTCTCATTCTTCTTCTTCTTCTTCTTCTTCTTCTTCTTCT
GAAATGATCATAATCTGCTTAGAGAATTTAATGCCATGACTCAGATGAGAAGTAGAAAGATTGTTTCACTTTCATTAGT
TATTTTGGCGTAACATTTGATATCTTCATATCTTTTCGAAATCCGCACATCTGGACAGAAATATGATTTATCTTATAA
ATGTTTATGAAATAGTTGTCACGTAAGAAATGTTAGAATGCTACCTAAATAACGTTGTGCTCTTGTGATGTGTCAAC
TGTTAAACACTAACAAACAACTAATCAGGATTCGTTTTTAAATTAAGATAGAGTGGTGGGTTTTTTTTTTTGGT
TGGGCTGGAAACCATAAAATTAAGGCTAGTTTCTATTCTTGTAAATATTAAGACTTGGCTTATAGTTTTCTTGTG
TTAAATAAAGACTTTTGTCTATGAGGAGACTGGGTCAAACATGGGTGACAGTGAAGCCAATGGGCAGCTAGGGATT
CCTTATAATATATAATGATGTTCTGACCATGGGCAACCTTTTATTACATTAATAATTAAGTTACATCATATA
ACGTCATATATGATATGTTATACTCGGTTGATCAAAAAAAAAAAGTATGTGTTATAATTGACCAGCTTTCTGAATTCT
CTATAGTTTATATATAAAGAGCATGATTTGTTCAAGTCTAAAGATGTGCTGTATGGATCTATAATCTTCTTAATG
TGAATCTTTAAAGGCTACCAGATTTGTGATCAACATGATTTCTTTTGGTCAACTGTTTAAACCGCATTTATACATAA
AGCTAGGTTTAAACTTTTCCGAATAGTAAACCAATAGATTAAGGCTCTCAACAATGTTTTTTTGGCTATCTAGCATT
GTTTAAATAGCAAATAAATCAATTTTAAATGGATTTGCATACAAAGAAACAAAAGTCTTGAATATTTGGTGGAGAAAG
TGTAATAATTAATATATTAAGAGTTGATAATGGGATTAATTAATACTATTAGAAGGCAGCGCAGCCTCATAAAGTGGCG
ATACCTTAAACAGAGCACTTGGATGGCTTTTGTATTTGTGGATCCACGCACATTCGAATCAACGATGTACATACTTT
ATACGTTTTATGTTAGTGTTTTTTTTGTAAATACTTTATAAGATTATGCTTATAATCTTTTCAGATTAGACACTAGA
TTTTCGTTAATCTTTTGTAACTGCAACGAAAAATCCCGGCTACCTCTACATATTTATAACATTGCTATATTTGTAAA
TTTGATTAACATTACAGAAACAACTATAACATTAACAGTCATGTAACACTAATTTGTAATAACATGTAACATTTGCATGG
AAATGAAGAGAGCATAAACTTAGGTAATAAACACAAAAATATGTAGGAAAAAGTAGCTAAGAACATTAATCATACATG
CTAAAAATACCGTTTCAATTGAAATATATGTGTAATCTCGCATTAGTATAGTATTTTACAATCTTGAATTAATGACAT
GCTCTGCGAATTAGTAACTACATAAAAAATTACGAAAAACAGAAATACAGAAAAATATATAAAAGGTATATTTATTTA
TAGAAAACTTGATACAACAAAACTAATAAAAAATTAGGCAGATTTATCGGGTGGATCTTTGAACATGGATTAATTTCTCT
TAAATACCACAACAACAAAACAATACGTACATACGAAAAACCCAGAAAAGAGAGCGCAAGCAAGACTTTCTTCAAAGTT
GGATTGCGTCAAAAATAATCAAAAAACGAACCAACAGATGCGAAAAAGCGCGCCCGGCGGATAACCCGAGTAAACCGGTT
TGGAGTTTTGTAACACTACATAAAAATTGCTCAGCAACCTCACACACAACAACAACTCCACGTTTGGACAGAGATAGA
GGACGAAGGAGCCTTCACTCTCTCTCTCTCTCTCTCTCTCTCTCTCTCTCTCTCTCTCTCTCTCTCTCTCTCTCTCT
GAGAAAAGTAAACGAGAGAGAGATTTTTTGAAGTACTCGAGATGCTAACTACTAAAGGATTTTCAGGTCGATCTA
AGAATCCGTCGTTGGAAGCTCGTCAACGATGGCGATCTCCGTGGGACTCGTAAAAATCGGGCTCGTCTCTCTCTCTCT
ATCAGTAATCTCGACAACTCGCTGAGAATGAGAAGAAGAGATGCCAGATCCAGGAAAAGATAAGGGTTGCTTCTATGT
TCAAAAGGCAGCTTTTCAGTTTATTGATGCTGGTGCCTCCCTGAATATAAATCACTGATGAGGTCAAAAAGCAGGAT
TTTATGTCGAAAGCAGATGACTTGTCTTATGGTTCGCAATCATGACACAAAAGAGCCTTCAAAAAATCGGAGGACTGAA
GGAATCGCTCAGAAAGTATCTGTATCTCTCGTGAAGGTGACGTTCCAGTGAACATACACATCAGAGAAAAATCTATGG
```

AGAAAACCGTTATACTGAGAAACCAGCCAGATCATTTTTAACGTTTGTGGGAAGCGCTTCAAGACATTACCCCTATCA  
TCCTTATGGTCTGCGCTGTAGTATCAATAGGAGTGGGAGTTGCAACAGAAGTTTTCCAAAGGGCATGTATGAGGGACG  
GGGATCTGCTTAGTATAATCTTGGTGGTCATGGTTACTGCTATCAGTGACTACAAGCAATCTTGCAGTTCAGAGATTT  
GGATCGAGAGAAAAAGAGATTATATTCAAGTACCAGGGATGGCAGCAGACAAGAGGTCTCCATCCATGACTTGGTTG  
TTGGAGATGTGGTCCATTATCTATTGGGGATCAAGTTCAGCTGATGGGATTTTTATATCCGGATACAATCTGGAGATA  
GACGAGTCAAGCTTATCGGGCGAGAGTGAACCATCACATGTGAATAAAGAGAAGCCGTTTCTGCTTTCAGGAACCAAAGT  
CCAAAACGGCTCTGCAAAAATGCTGGTGACAACCGTTGGTATGAGGACTGAGTGGGAAAGTTGATGGATACTCTGAGTG  
AGGGTGGAGAGGATGAGACCCCTCTGCAGGTGAACTAAATGGTGTTCACAACAATCATAGGTAAGATTGGTTTAGGCTTT  
GCAGTGTACGTTTGTGGTGTGTGCATAAGGTTCTGTGGGAGAAAGCCACGGCTGGTAGCATCACTGAGTGGTCTTC  
TGAAGATGCACTAACATTGAGCTTGACTACTTTGCAATTGCTGTACCATTATAGTCTGTTGCTGTACCTGAAGGTTACCTT  
TGGCTGTGACCTTAAGTCTAGCATTGTCTATGAAGCAATTAATGAGTGATAGGGCCTTGTAAAGCATCTGGCTGCATGT  
GAGACGATGGGTTCTTCTACTGCATCTGCACGGATAAAAACAGGGACCTTAACCATAACCATGGTAGTCAACAAAAGT  
TTGGATATGTGAAAATATCAAAGAGAGGCAAGAGGAAAACCTCCAGTTGAACCTATCCGAACAAGTTAAGAATATCCTTA  
TACAGGCCATATTTCAAGCAACTGGTCTGAAAGTTGTTAAGGATAAGGAAGGAAAACTCAGATCCTGGGTTACCTACA  
GAAAGGGCGATACTGGAATTTGGTGTGCTTTGGTGGTGGACGTTGACACGCAACCGCGAGAACATAAGATACTCAAGAT  
CGAGCCATTCAACTCAGACAAGAAGAAAATGTCTGTTCTTACATCTCATTAGGTGGTAAAGTACGTGCTTTCTGCAAG  
GTGCATCTGAAATAGTCTTGAAAATGTGTGAGAAGTTGTGGATTCAAACGGAGAACTCTGTTCCCTTATCTGAAAGAAA  
ATTGCAAGTATCTCTGATGTATAGAGGGATTTGCTTTCAGAGGCTCTTAGGACTCTCTGCTTAGTTTACACGGATCTTGA  
TGAAGCTCCAGAGGGGATCTTCTAATGGTGGTACACATTGGTAGCAGTTGTTGGAATCAAGGACCCGTTTCGGCCTG  
GTGTTAGGGAAGCCGTTTCAAGCTGCTGGAATCACTGTTCTGATGGTCACTGGTGATAACATTAGCACTGCC  
AAAGCGATTGCAAAAGGAATGGTATACCTTACAGCAGGAGGTGTAGCTATAGAAGGTTTCAAGCTTCCGTAATTCGCTC  
ACATGAAATGAGGGCCATTCTACCGAAAATCCAGGTGATGGCTCGGCTTTTGGCATTGGACAAAACATACATTAGTCAACA  
ACTTGAGGAAAATGGGAGAGGTAGTTGCAGTACTGGGGATGGAACAAATGATGCTCCTGCATTGCATGAGGCTGACATT  
GGACTGGCATGGGAATAGCTGGAACAGAGGTTGCGAAAAGAGAATGCTGATGTTATCATAAATGGACGACAACCTTTGCAAC  
AATAGTGAATGTGGCAAAATGGGGACCTGCTGTATATCAACATCCAGAAGTTTGTTCAGTCCAGCTAACTGTTAATG  
TTGTTGCTCTGATCATCACTTTGCTCTGCTTGCATCACTGGATCTGCGCCACTCACCGCAGTGCACCTGCTTTGGGTG  
AACATGATCATGGACACACTTGGTGCATTGGCTCTAGCGACCGAACCTCCCAACGAAGGTTAATGAAACGCCAACCAAT  
CGGTAGAACAGCAAGCTTCACTACCAGAGCTATGTGGAGAAACATCATTTGGTCAAAGCATTATCAGTTAATCGTTCTCG  
GCATCTCAACTTTTCTGGCAAAACAAATACTCAACCTTAATGGCCAGATTCAACAATGTTCTCAACAAATTTCTTC  
AACTCTTTCGCTTTTGGCAGGTGTTAATGAAGTAAACAGCAGAGAGATAGAGAAGATAAATGTGTTGCAAGGAATGTT  
CAAGAGTTGGGTGTTTGTGCTGTAATGACTGCAACAGTTGGATTCCAAGTATCATTTGTTGAGTTCTTGGAGCATTG  
CAAGCACTGTTCTTCTGGCAAAACAAATACTCAACCTTAATGGCCAGATTCAACAATGTTCTCAACAAATTTCTTC  
CTTAAATGCATACCGGTTGAGTCTAACCGTCACTACGATGGCTATGAGCTGCTTCTTCTGGTCCATCTGACTCTGCCGG  
AGGTGGACTAGTGTGTTGAGCAAGGGCGAGGAGCTGTTACCGGGGTTGGTCCCATCTGCTGAGCTGGACGGCGCAGC  
TAAACGGCCACAAGTTTCAAGCTGTCGGCGAGGGCGAGGGCGATGCCACCTACGGCAAGCTGACCCCTGAAGTTCACTG  
ACCACGGCAAGCTGCCGTTGCCCTGGCCACCCTCGTGACCACTTCACTACGGCGTGCAGTGTCTCAGCCGCTACCC  
CGACCACATGAAGCAGCAGACTTCTTCAAGTCCGCCATGCCCGAAGGCTACGTCAGGAGCGCACCATCTTCTCAAGG  
ACGACGGCAACTACAGACCCGCGCCGAGGTGAAGTTCGAGGGCGACACCTGGTGAACCCGATCGAGCTGAAGGGCATC  
GACTTCAAGGAGGACGGCAACATCTGGGGCACAAGCTGGAGTAACTACAACAGCCACAACGCTTATATCATGGCCGA  
CAAGCAGAAAGAACCGCATCAAGGTGAACCTTCAAGATCCGCCACAACATCGAGGACGGCAGCGTGCAGCTCCGCCACT  
ACCAGCAGAACACCCCATCGGCGACGGCCCGTGTGCTGCCGACAACCACTACCTGAGCACCCAGTCCGCCCTGAGC  
AAAGACCCCAACGAGAAGCCGATACATGGTCTGCTGGAGTTCGTGACCCCGCCGGGATCACTCACGGCATGGACGA  
CCTGTACAAGGGCTAGACCCGGGAATGCATCACCATCACCATCCAGGATCCTGATTGATCGATAGAGCTCGAATTTCCC  
GCTCGTTCAAACATTTGGCAATAAAGTTTCTTAAAGTGAATCCTGTTGCCGCTTTCGATGATATATATAAATTTCT  
TGTGAAATTACGTTAAGCATGTAATAAATTAACATGTAATGTCATGACGTTATTTATGAGATGGGTTTTATGATTAGAGTC  
CCGCAATATACATTTAATACGGATAGAAAACAAAATATAGCGCGAAAAC TAGGATAAATATCGCGCGGGTGTGCATC  
TATGTTACTAGATCGGGAATTCAGCTTTTGTTCCTTACTGTAGGGTTAATTCAGGCTTGGCGTAATCATGTTACAGC  
TGTTTTCTGTGAAATTTGTTATCCGCTCACAATTCACACAACATACGAGCCGGAAGHCATAAAGTGTAAAGCCTGGGG  
TGCCTAATGAGTGAGCTAATCACAATTAATGCGTGTGCGCTCACTGCCCGCTTTCAGTCCGGAAACCTGTGCTGCCAGC  
TGCATTAATGAATCGGCCAACGCGCGGGGAGAGGCGGTTTGGCTATTGGGCGCTTTCGCTTCTCGCTCACTGACTCG  
CTGCGCTCGTTCGCTGCGCGCAGCGGATCAGCTCACTCAAAGCCGCTAATACGGTTATCCACAGAATCAGGGGA  
TAAACGAGAAAGAACATGAAGGCTTGACAGGATATATTGGCGGTAACCTAAGTCTGTATGTGTTTGTGAGATC  
TCATGTGAGCAAAAGGCCAGCAAAAGGCCAGGAACCGTAAAAAGCCGCTGCTGGCGTTTTCCATAGGCTCCGCCCC  
CCTGACGAGCATCAAAAATCGACGCTCAAGTCAAGGTTGGCGAAACCCGACAGGACTATAAAGATACAGGCGTTTCC  
CCCTGGAAGCTCCCTCGTGGCTCTCCTGTTCCGACCTGCCGCTTACCGGATACCTGTCCGCTTCTCCCTTCGGGAA  
CGGTGGCGCTTCTCATAGCTCACGCTGTAGGTATCTCAGTTCGGTGTAGGTCGTTCCGCTCAAGCTGGGCTGTGTGCAC  
GAACCCCTTTCAGCCGACCGCTGCGCTTATCCGGTAACTATCGTCTTGTGATCAACCCGGTAAGACACGACTTATC  
GCCACTGGCAGCAGCCACTGGTAAACAGGATTAGCAGAGCGAGGTATGTAGGCGGTGCTACAGAGTTCTTGAAGTGGTGGC  
CTAACTACGGCTACACTAGAAGAACAGTATTTGGTATCTGCGCTCTGCTGAAGCCAGTTACCTTCGGAAGAAGGTTGGT  
AGCTCTTGTATCCGGCAACAACACCCGCTGGTAGCGTGGTTTTTTTGTGTTGCAAGCAGCAGATTACGCGCAGAAAAA  
AGGATCTCAAGAAGATCTTTGATCTTTTCTACGGGCTGAGCGCTCAGTGAACGAAAACTACGTTAAGGGATTTTGG  
TCATGAGATTATCAAAAAGGATCTTCACTTAGATCCTTTAAATTAAAAATGAAGTTTAAATCAATCTAAAGTATATAT  
GTGTAACATTGGTCTAGTGATTAGAAAACTCATCGAGCATCAATGAAACTGCAATTTATTCATATCAGGATTTATCAAT  
ACCATATTTTGAAGAGCGTTTCTGTAAATGAAGGAGAAAACCTCACCGAGGAGTTCCATAGGATGGCAAGATCTGTT  
ATCGGCTGCGGATCCGACTCGTCAACATCAATAACAACCTAATTAATTTCCCTCGTCAAAAATAAGGTTATCAAGTGAG  
AAATCACTGAGTGCAGCTGAATCCGCTGAGAAAGTTTATGCAATTTCTTTCAGACTTGTTCACAGACTTGTTCACAGGCCA  
GCCATTACGCTCGTCAAAAATCACTCGCATCAACAAAACCGTTATTCATTCGTGATGCGCCTGAGCGAGACGAAATA  
CGCGATCGCTGTTAAAGGCAAAATACAAAACAGGAATCGAATGCAACCCGCGCAGGAACACTGCCAGCGCATCAACAATA  
TTTTACCTGAATCAGGATATCTTCTAATACCTGGAATGCTGTTTTCCCTGGGATCGCAGTGGTGAATACCATGCATC  
ATCAGGATACGGATAAAAATGCTTGTAGTGTCCGGAAGGCAATAAAAATCCGCTCAGCCAGTTTGTCTGACCATCATCTG  
TAAACAATTTGGCAACGCTACCTTTGCCATGTTTTCAGAAAACACTCTGGCGCATCGGGCTTCCCATACAATCGGTAGATT

GTCGCACCTGATTGCCCGACATTATCGCGAGCCCATTTATACCCATATAAAATCAGCATCCATGTTGGAATTTAATCGCGG  
CCTTGAGCAAGACGTTTCCCGTTGAATATGGCTCATAACACCCTTGTATTACTGTTTATGTAAGCAGACAGTTTTATTG  
TTCATGATGATATATTTTTATCTTGTGCAATGTAAACATCAGAGATTTTGAGACACAACGTGGCTTTGTTGAATAAATCGA  
ACTTTTGGCTGAGTTGAAGGATCAGATCAGCATCTCCCGACAACGCAGACCGTTCCGTGGCAAAGCAAAGTTCAAAAT  
CACCAACTGGTCCACCTACAACAAAGCTCTCATCAACCGTGGCTCCCTCACTTTCTGGCTGGATGATGGGGCGATTTCAG  
CGATCCCATCCAACAGCCCGCTCGAGCGGGCT

ps1658, 35s:: *ACA11-GFP* (The 35s promoter is cloned between a Sbf1 site at 2642 and a unique Xho1 site at 3533. The *ACA11-GFP* cDNA coding sequence is cloned between Xho1 at 3533 and a unique SacI at 7401.

TTTTTATCCCGGAAGCCTGTGGATAGAGGGTAGTTATCCACGTGAAACCGCTAATGCCCGCAAAGCCTTGATTCACGG  
GGCTTTCCGGCCCGCTCCAAAACATATCCACGTGAAATCGCTAATCAGGGTACGTGAAATCGCTAATCGGAGTACGTGAA  
ATCGCTAATAAGGTCACGTGAAATCGCTAATCAAAAAGGCACGTGAGAACGCTAATAGCCCTTTCAGATCAACAGCTTGC  
AAACACCCTCGCTCCGGCAAGTAGTTACAGCAAGTAGTATGTTCAATTAGCTTTTCAATTATGAATATATATATCAATT  
ATTGGTCGCCCTTGCTTTGGACAATGCGCTACGCGCACCGGCTCCGCCCTGGACAACCGCAAGCGGTTGCCACCGT  
CGAGCGCCAGCGCTTTGCCACAAACCCGGCGGCGGCCGCAACAGATCGTTTATAAATTTTTTTTTGAAAAGAAA  
AAGCCCGAAAGGCGGCAACCTCTCGGGCTTCTGGATTCCCGATCCCGGAATTAGAGATCTTGGCAGGATATATTGTTG  
GTAACGTTATCGATCTGGATTTTAGTACTGGATTTTGGTTTTAGGAATTAGAAATTTTATTGATAGAAGTATTTTACAAA  
TACAAATACATACTAAGGGTTTCTTATATGCTCAACACATGAGCGAAACCTATAAGAACCCTAATTTCCCTTATCGGGA  
AATACTCACACATTATTTATGGAGAAAATAGAGAGAGATAGATTTGTAGAGAGAGACTGGTGAATTCAGCGTACCGAAT  
TAATTTCCCGGACCCAGCCGAGCGAGCTTAGCGAACTGTGGACGAGAAGTGTGCCACCAAGCGTAAGGCCGTTCTCTCG  
CATTTGCCCTTGTAGGCTCGCGCAGATTGCTGGCTGAGGCGTTCTCGAAATCAGCTTTGTTCCGGTCCGCATCTACTCTA  
TTCCTTTGCCCTCGGACGAGTGTGGGGCGTCCGTTCCACTATCGGCGAGTACTTCTACACAGCCATCGTCCAGACGG  
CCGCGCTTCTGCGGGCGATTGTTGTACGCCCGACAGTCCCGGCTCCGGATCGGACGATTGCGTCCGATCGACCTGCGCC  
CAAGCTGCATCATCGAAATGCCGTCAACCAAGCTCTGATAGAGTTGGTCAAGACCAATGCGGAGCATATACGCCCGGAG  
GCGTGGCGATCCTGCAAGCTCCGGATGCCTCCGCTCGAAGTAGCGCGTCTGCTGCTCCATAAAGCAACACCGGCTCC  
AGAAGAAGATGTTGGCGACTCGTATTGGGAATCCCGAACATCGCCTCGCTCCAGTCAATGACCGCTGTTATGCGGCCA  
TTGTCCGTGAGGACATTTGTTGGAGCCGAAATCCGCGTGCACGAGGTGCCGGACTTCGGGGCAGTCCCTCGGCCAAAGCAT  
CAGCTCATCGAGAGCTGCGCGACGGACGCACTGACGGTGTGCTCCATCACAGTTTGCAGTGATACACATGGGGATCAG  
CAATCGCGCATATGAAATCAGCCATGTAGTGTATTGACCGATTCCTTGGCGTCCGAATGGGCCGAAACCCGCTCGTCTGG  
TAAGATCGGCCGACGCGATCGCATCCATAGCCTCCGCGACCCGGTGAAGAACAGCGGGCAGTTCCGTTTTCAGGACGTC  
TTGCAACGTGACACCCTGTGACCGCGGGAGATGCAATAGGTCAGGCTCTCGTGAAGTCCCAATGTCAAGCACTCCG  
GAATCGGGAGCGCGCCGATGCAAGTGCAGATAAACATAACGATCTTTGTAGAAACCATCGGCGCAGCTATTTACCCGC  
AGGACATATCCAGCCCTCTACATCGAAGTGAAGCAGCAGATTTCTCGCCCTCCGAGAGCTGCATCAGGTCCGAGAC  
GCTGTGCAACTTTTCGATCGAAGAACTTCTCGACAGACTCGCGGTGAGTTCAAGCTTTTTTCATAGGATCAGTTGGGCT  
GTCCTCTCCAAATGAAATGAACTTCTTATATAGAGGAAGGGTCTTGGCAAGGATAGTGGGATTGTGCGTCATCCCTTAC  
GTCAGTGGAGATGTACATCAATCCACTTGCTTTGAAGACGTGGTGGAACTCTTCTTTTCCACGATGTCTCTGCTGG  
TAGGGGGTCCATCTTTGGGACCCTGTGCGGACAGGGCATCTTGAATGATAGCCTTTCTTTTATCGCAATGATGGCATTG  
TAGGAGCCACCTTCTTTTACTGTCTTTCGATGAACTTTCGATGAACTGACAGTAGCTGGGCAATGGAATCCGAGGAGTTCCCGA  
AATTACCTTTGTTGAAAAGTCTCAATAGCCCTTTGGTCTTCTGAGACTGTATCTTTGACATTTTTGGAGTAGGGGTACG  
ATAACATTAACGTTTACAATTTCCGCCATTCGCCATTCAGGCTCGCAACTGTTGGGAAGGGCGATCGGTGCGGGCCCT  
TTCGCTATTACCCAGCTGGCGAAAGGGGATGTGCTGCAAGGCGATTAGTGGTAAACCCAGGGTTTTCCAGTCA  
GACGTTGTAAAACGACCGGCGAGTGAATTTAATACGACTCACTATAGGGCGAATGGGTACCCTCGCAGGAAGCTTGCAT  
GCCTGACAGTCAACATGGTGGAGCACGACACACTTGTCTACTCCAAAATATCAAAGATACAGTCTCAGAAGACCAAGG  
GCAATTGAGACTTTTCAACAAGGGTAATATCCGAAAACCTCCTCGGATTCATTGCCAGCTATCTGTCACTTTATTG  
GAAGATAGTGGAAAAGGAGGTTGGCTCCTACAAATGCCATATTGCGATAAAGGAAAGCCATCGTTGAAGATGCCTCTG  
CCGACAGTGGTCCAAAAGATGGACCCCCACCCAGGAGCATCGTGGAAAAAGAAGAGCTTCCAACCAGCTTCAAAG  
CAAGTGGATTGATGTGATAACATGGTGGAGCACGACACACTTGTCTACTCCAAAATATCAAAGATACAGTCTCAGAAGA  
CCAAAGGGCAATTGAGACTTTTCAACAAGGGTAATATCCGAAAACCTCCTCGGATTCATTGCCAGCTATCTGTCACT  
TTATTGTGAAGATAGTGGAAAAGGAGGTTGGCTCCTACAAATGCCATATTGCGATAAAGGAAAGCCATCGTTGAAGAT  
GCCTCTGCCGACAGTGGTCCAAAAGATGGACCCCCACCCAGGAGCATCGTGGAAAAAGAAGACGTTCCAACCAGCTC  
TTCAAAGCAAGTGGATTGATGTGATATCTCCACTGACGTAAGGGATGACGCACAATCCCATATCTTCCGCAAGACCCCT  
CCTCTATATTAGGAAGTTCATTTCAATTTGGAGAGGACCTCGACCTCAACACAACATATACAAAACAACGAATCTCAAG  
AATCAAGCATCTACTTCTATTGACGAAATTAATCATTTCTTTTAAAGCCAAAGCAATTTCTGGAAATTTTCAACCAT  
TTACGAAACGATACTCGAGATGTCTAATCTACTAAAGGATTTGAGGTCGCATCTAAGAATCCGTGCTGGAAGCTCGTCA  
ACGATGGCGATCCTCCGTGGACTCGTAAAAAATCGGGCTCGTCTTCCGTATGATCAGTAATCTCGACAAACTCGCTG  
AGAATGAGAAGAAGAGATGCCAGATCCAGGAAAAGATAAGGGTTGCTTCTATGTTCAAAGGCAGCTTTTCAAGTTTATT  
GATGCTGGTGCCTCCCTGAATAAAAACACTCACTGATGAGGTCAAAAAAGCAGGATTTTATGTCGAAGCAGATGAGCTTGC  
TTCTATGTTTCGCAATCATGACACAAGAGCCTTACAAAATCGGAGGACCTGAAGGAATCGCTCAGAAAGTATCTGTAT  
CTCTCGCTGAAGGTGACGTTTCGAGTGAATACACATCAGAGAAAAATCTATGGAGAAAAACCGTTATACTGAGAAACCA  
GCCAGATCATTTTTAACGTTTGTGTTGGGAAGCGCTTCAAGACATTACCCTTATCATCTTATGGTCTGCGCTGTAGTATC  
AATAGGAGTGGGAGTTGCAACAGAAAGGTTTCCAAAGGCATGTATGATGGGACGGGGATCTTGCTTAGTATAATCTTGG  
TGGTCAATGTTACTGCTATCAGTACTACAAGCAATCTTTGCAAGTTCAGAGATTTGGATCGAGAGAAAAAGAAATATT  
ATTCAGTCAACAGGATGGCAGCAGACAAGAGGTTCCATCCATGACTTGGTTGTTGGAGATGTGGTCCATTTATCTAT  
TGGGATCAAGTTCAGTCTGAGTGGGATTTTATATCCGATAACAATCTGGAGATAGACGAGTCAAGCTTATCGGGCGAGA  
GTGAACCATCACATGTGAATAAAGAGAAGCCGTTTCTGCTTTCAGGAACCAAGTCCAAAACCGCTCTGCAAAAATGCTG  
GTGACAAACGTTGGTATGAGGACTGAGTGGGAAAGTTGATGGATACTCTGAGTGGGGTGGAGAGGATGAGACCCCTCT  
GCAGGTGAACTAAATGGTGTGCAACAATCATAGGTAAGATTGGTTTAGGCTTTCAGTGTCTTACGTTTGTGGTGTGT  
GCATAAGGTTCTGTTGTGGAAAAGCCACCGCTGATGATCACTGAGTGTCTTCTGAAGATGCACCTAACATTTGCTGAC  
TACTTTGCAATGCTGTTACCATTATAGTCTGTGCTGACCTGAAGGTTACCTTTGGCTGTGACCTTAAGTCTAGCATT



TGCTATGAAGCAATTAATGAGTGATAGGGCACTTGTAAAGCATCTGGCTGCATGTGAGACGATGGGTTCTTCTACCTGCA  
TCTGCACGGATAAAAACAGGGACCTTAACCACTAACACATGGTAGTCAACAAAGTTGGATATGTGAAAAATCAAGAG  
AGGCAAGAGGAAAACCTCCAGTTGAACCTATCCGAACAAGTTAAGAATATCCTTATACAGGCCATATTTGAGAACACTGG  
TTCTGAAGTTGTTAAGGATAAGGAAAGGAAAACCTCAGATCCTGGGTTACCTACAGAAAGGGCGATCTGGAATTTGGTT  
TGCTTTTGGGTGGTACGTTGACACGCAACGCCGAGAACAATAAGATACTCAAGATCGAGCCATTCAACTCAGACAAGAAG  
AAAATGTCTGTTCTTACATCTCATTCAGGTGGTAAAGTACGTGCTTTCTGCAAAGGTGCATCTGAAATAGTCTTAAAAAT  
GTGTGAGAAGTTTGGATTCAAACGGAGAATCTGTTCCCTTTATCTGAAGAAAAGATTGCAAGTATCTCTGATGTCATAG  
AGGGATTTGCTTCAGAGGCTCTTAGGACTCTCTGCTTAGTTTACACGGATCTTGATGAAGCTCCCAGAGGGGATCTTCCT  
AATGGTGGCTACACATTGGTAGCAGTTGTTGGAATCAAGGACCCGGTTCGGCTGGTGTAGGGAAGCCGTTACAGACTTG  
TCAAGCTGCTGGAATCACTGTTCTGATGGTCACTGGTGATAACATTAGCACTGCCAAAGCGATTGCAAAGGAATGTGTA  
TACTTACAGCAGGAGGTGTAGCTATAGAAGTTGACACTTCCGTAATTTGCCCTCCACATGAAATGAGGGCCATTCTACCG  
AAAATCCAGGTGATGGCTCGGTCTTTGCCATTGGCAACAACATACATTAGTCAACAACCTTGAGGAAAATGGGAGAGGTAGT  
TGCAGTGACTGGGGATGGAACAAATGATGCTCCTGCATTGCATGAGGCTGACATTGGACTTCCATGGGAATAGCTGGAA  
CAGAGGTTGCGAAAAGAGAAATGCTGATGTTATCATAAATGGACGACAACTTTGCAACAATAGTGAATGTGGCAAAAATGGGGA  
CGTGCTGTGATATCAACATCCAGAAGTTGTTCAAGTCCAGTAACTGTTAATGTTGTTGCTGATCATCAACTTTGT  
CTCTGCTTGATCACTGGATCTGCGCCACTCACCGCAGTGCAACTGCTTTGGGTGAACATGATCATGGACACACTTTGGTG  
AATGGCTTAGCGACCGAACCTCCCAAGGAGTTTAAATGAAACGCCAACCAATCGGTAGAACAGCAAGCTTCAACCC  
AGAGCTATGTGGAGAAAACATCATTGGTCAAAGCATTATCAGTTAATCGTTTCTCGGCATCCTCAACTTTGCTGGCAACA  
AATACTCAACCTTAATGGCCAGATTAACAATTTGTTCTCAACACAATATCTCAACTCTTTCGCTTTTTCAGGTTGT  
TTAATGAAGTAAACAGCAGAGAGATAGAGAAGATAAATGTGTTGCAAGGAATGTTCAAGAGTTGGGTGTTTGTGCTGTA  
ATGACTGCAACAGTTGGATTCCAAGTGATCATTGTTGAGTTTCAATGGAGCAATTTGCAAGCACTGTTCTTTGAGCTGGCA  
ACATTGGCTACTCTGCATTTTGATTGGTTCCGTAAGCATGATTCTAGCCGTTGGTCTTAAATGCATACCGGTTGAGTCTA  
ACCGTATCAGATGGCTATGAGCTGCTTCTTCTGGTCCATCTGACTCTGCGGAGGTTGGACTAGTGATGGTGAAGCAAG  
GGCAGGAGCTGTTACCGGGGTTGGTCCCATCTGGTCCAGCTGGACGGCGACGTAACCGGCCACAAGTTACAGCTGTC  
CGCGAGGGCGAGGGCCAGCCACTACGGCAAGCTTGAAGTTTCAATCTGCACCCACCGGCAAGCTGCGCCCT  
GGCCACCCTCGTGACCACCTTACCTACGGCGTGCAGTCTTACCGCTACCCGACCACATGAAGCAGCAGACTTC  
TTCAAGTCCGCCATGCCGAAGGCTACGTCCAGGAGCGCACCATCTTCTTCAAGGACGACGGCAACTACAAGACCCGCGC  
CGAGGTGAAGTTGAGGGCGACACCTGGTGAACCGCATCGAGCTGAAGGGCATCGACTTCAAGGAGGACGGCAACATCC  
TGGGGCACAAGCTGAGTACAACACTACAACAGCCACAACGCTTATATCATGGCCGACAAAGCAGAAAGAACGGCATCAAGGT  
AACTTCAAGATCCGCCACAACATCGAGGACGGCAGCTGCAGTCTGCGGACCACTACCAGCAGAACACCCCATCGGCGA  
CGCCCGTGTGCTGCCCCGACAACCACTACCTGAGCACCAGTCCGCGCTGAGCAAAAGACCCCAACGAGAAGCGCGAT  
ACATGTCTCTGTGAGTTAGCGCGCAAACTAGGATAAATTTACCGCGCGGCTGATCATCTATGTTACTAGATCGGAAATTCAG  
ATGCATCACCATCACCATCAGGATCCTGATTGATCGATAGAGCTCGAATTTCCCGATCGTTCAAACATTTGGCAATAA  
AGTTTCTTAAGATTGAATCCTGTTGCCGCTTTCGATGATTATCATATAATTTCTGTTGAATTACGTTAAGCATGTAAT  
AATTAACATGTAATGCATGACGTTATTTATGAGATGGGTTTTTATGATTAGAGTCCCGCAATTTACATTTAATACGCGA  
TAGAAAACAAAATATAGCGCGCAAACTAGGATAAATTTACCGCGCGGTTGATCATCTATGTTACTAGATCGGAAATTCAG  
TTTTGTTCCCTTTAGTGAGGGTTAATCCGAGCTTGGCGTAATCATGGTCATAGCTGTTTCTGTGAAATGTTATCC  
GCTCACAATTCACACAACATACAGCCGGAAGHCATAAAGTGTAAAGCCTGGGTTGCCTAATGAGTGAGTAACTCACA  
TTAATGCGTTGCGCTCACTGCCGCTTTCCAGTCCGGAACCTGCTGTCAGCTGCATTAAATGAATCGGCCAACCGCG  
GGGAGAGCGGTTTGGCTATTGGCGCTTTCGCTTCTCGCTCACTGACTCGCTGCGCTGCGTCTGCTGCTGCGG  
GAGCGGTATCAGCTCACTCAAAGCGGTAATACGGTTATCCACAGAATCAGGGGATAACCGAGGAAAGAACATGAAGGCC  
TTGACAGGATATATTTGGCGGGTAAACTAAGTCCGCTGATGTTGTTGTTGAGATCTCATGTGAGCAAAAGGCCAGCAAAA  
GGCAGGAACCGTAAAAGGCGCGTGGCTGGCGTTTTTCCATAGGCTCCGCCCTGACGAGCATCACAAAAATCGAC  
GCTCAAGTCAAGAGTGGCGAAACCCGACAGGACTATAAAGATACCAAGGCTTTCCCGTGGAAAGCTCCCTCGCGCTCT  
CCTGTTCCGACCCCTGCGCTTACCAGGATACCTGTCGCTTTTCTCCCTTCCGGAAAGGTTGGGCTTCTCATAGCTCAG  
CTGTAGGTATCTCAGTTCGGTGTAGGTCGTTCCGCTCAAGCTGGGCTGTGTGCACGAAACCCCGTTTCCAGCCGACCGCT  
GGCCTTATCCGGTAACTATCGTCTTGAGTCCAACCCGGTAAAGACAGCACTTATCGCCACTGGCAGCAGCCACTGGTAAC  
AGGATTAGCAGAGCGAGGTATGTAGGCGGTGCTACAGAGTTCTTGAAGTGGTGGCCTAACTACGGCTACACTAGAAGAAC  
AGTATTTGGTATCTGCGCTCTGCTGAAGCCAGTTACCTTCGGAAGAAGAGTTGGTAGCTCTTGATCCGGCAACCAACCA  
CCGCTGGTAGCGGTGGTTTTTTTGTGTTGCAAGCAGCAGATTACCGCGCAGAAAAAAGGATCTCAAGAAGATCCTTTGATC  
TTTTCTACGGGCTGACGCTCAGTGGAAACGAAAACCTCACGTTAAGGATTTTGGTATGAGATTTCAAAAAAGGATCTT  
CACCTAGATCCTTTTAAATTAATAAATGAAGTTTAAATCAATCTAAAGTATATATGTGTAACATTGGTCTAGTGATTAGA  
AAAATCATCGAGCATCAATGAAACTGCAATTTATTATATCAGGATTTAATACCATATTTTGAAGAAAGCCGTTTC  
TGTAATGAAGGAGAAAACCTACCGAGGCAAGTCCATAGGATGGCAAGATCCTGGTATCGGCTCTGCGATTCCGACTCGTCC  
AACATCAATAACAACCTATTAATTTCCCTCGTCAAAAAATAAGTTTATCAAGTGAAGAAATCAGCATGAGTGACGACTGAAT  
CCGGTGAGAATGGCAAAAGTTTATGCATTTCTTTCCAGACTTGTTCACAGGCCAGCCATTACGCTCGTATCAAAATCA  
CTCGCATCAACCAACCGTTATTATTCTGATTTGCGCTGAGCGAGCAGAAATACCGGATCGCTGTTAAAAGGCAAAAT  
ACAAAACAGGAATCGAATGCAACCCGGCGCAGGAACACTGCCAGCGCATCAACAATATTTTCACTGAATCAGGATATCTT  
CTAATACCTGGAATGCTGTTTTCCCTGGGATCGCAGTGGTGAAGTAAACCATGCATCATCAGGAGTACGGATAAAAATGCTG  
ATGGTCGGAAGAGGCATAAATTCGCTCAGCCAGTTTAGTCTGACCATCTCATCTGTAACAACATTGGCAACGCTACCTTT  
GCCATGTTTCAAGAAACACTCTGGCGCATCGGGCTTCCCATACAATCGGTAGATTGTGCACTGATTGCCGACATTAT  
CGCGAGCCATTTATACCATATAAATCAGCATCCATGTTGGAATTTAATCGCGGCTTGGCAAGACGTTTCCCGTTGA  
ATATGGCTCATAACACCCCTTGTATTACTGTTTATGTAAGCAGACAGTTTTTATGTTTATGATGATATATTTTTATCTTG  
TGCAATGTAACATCAGAGATTTTGAACACAACGTTGGCTTTGTTGAATAAAATCGAACTTTTGTGAGTTGAAGGATCAGA  
TCACGCATCTTCCGACAACGCAGACCGTTCCGTGGCAAGGAAAAGTTCAAAATCACCAACTGGTCCACCTACAACAAA  
GCTCTCATCAACCGTGGCTCCCTCACTTTCTGGCTGGATGATGGGCGGATTGAGGATCCCATCCAACAGCCCGCGCT  
CGAGCGGCT
